# Supplementary material
Source: Copernicus journal article supplement (doi:10.5194/gmd-19-5907-2026)
Supplement: Supplementary file 1 [file gmd-19-5907-2026-supplement.pdf]

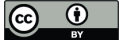

*Supplement of*

**Contribution of physical latent knowledge to the emulation of an atmospheric physics model: a study based on the LMDZ Atmospheric General Circulation Model**

Sékolène Crossouard et al.

*Correspondence to:* Sékolène Crossouard ([segolene.crossouard@lsce.ipsl.fr](mailto:segolene.crossouard@lsce.ipsl.fr))

The copyright of individual parts of the supplement might differ from the article licence.

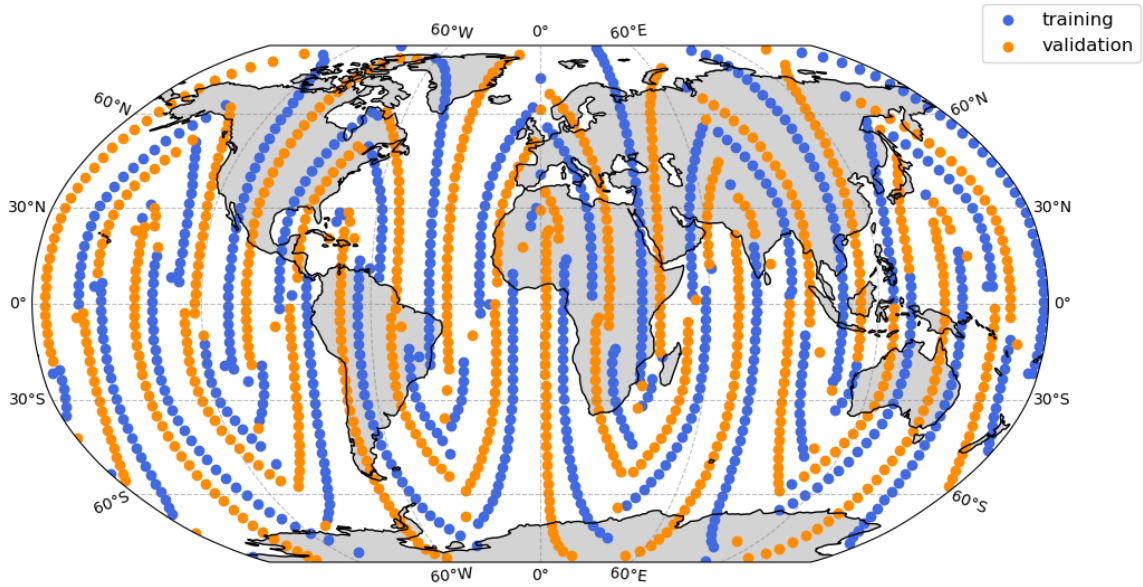

**Figure S1.** Distribution of grid cells over the globe used for training in blue and validation in orange, for the realistic configuration. The same distribution of grid cells is used for the aquaplanet.

**Table S1.** Description of the DNN architecture used for the first learning—the initial training without laplacian—and the second learning—with laplacians as additional predictors.

| Step                              | Layer | Number of neurons | Number of parameters<br>1 <sup>st</sup> learning | Number of parameters<br>2 <sup>nd</sup> learning |
|-----------------------------------|-------|-------------------|--------------------------------------------------|--------------------------------------------------|
| Input                             | Input | $X'$ length       | 0                                                | 0                                                |
| Hidden layers                     | Dense | 512               | 285,184                                          | 527,872                                          |
|                                   | Dense | 512               | 262,656                                          | 262,656                                          |
|                                   | Dense | 512               | 262,656                                          | 262,656                                          |
|                                   | Dense | 512               | 262,656                                          | 262,656                                          |
|                                   | Dense | 512               | 262,656                                          | 262,656                                          |
|                                   | Dense | 512               | 262,656                                          | 262,656                                          |
| Output                            | Dense | $Y'$ length       | 243,162                                          | 243,162                                          |
| <b>Total number of parameters</b> |       |                   | 1,841,626                                        | 2,084,314                                        |

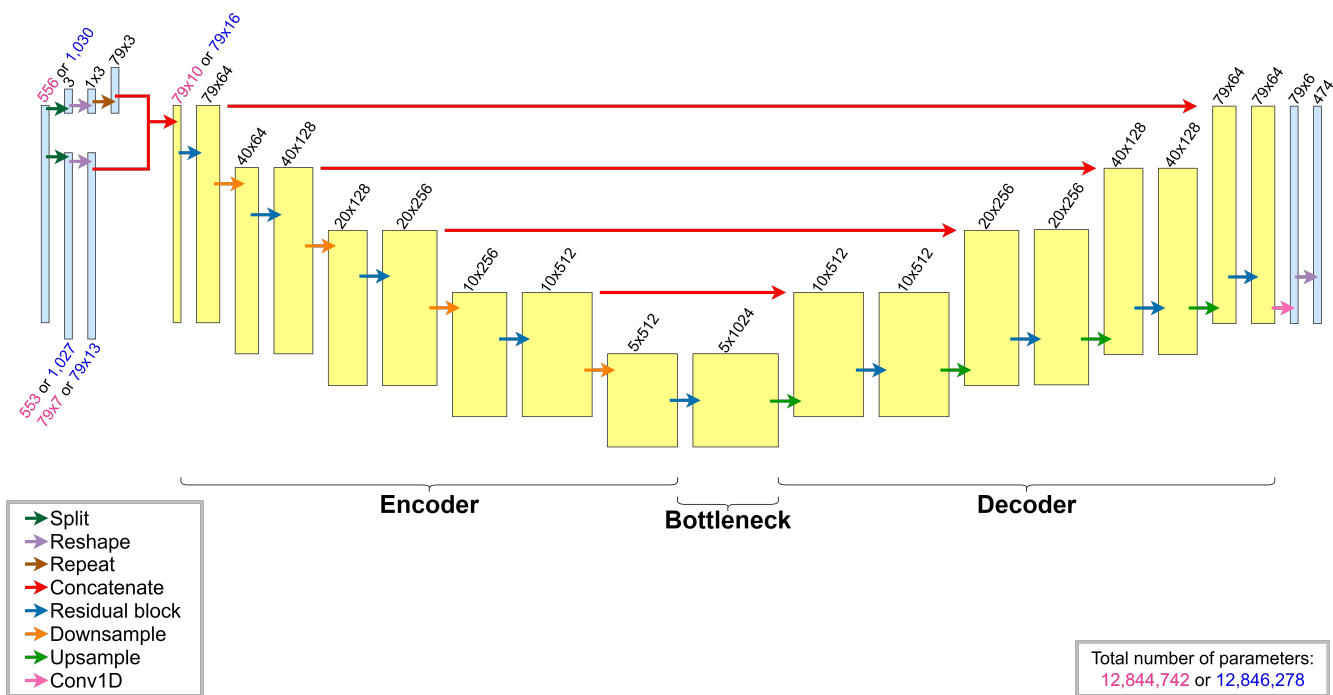

**Figure S2.** Diagram of the U-Net architecture. The blue and yellow boxes schematize the multi-channel features. The blue boxes correspond to the data formatting since the U-Net architecture —represented by the yellow boxes— works with 2D data whose dimensions correspond to the vertical levels times the number of variables. On the top (or sometimes the bottom) of each box is written the shape of the corresponding vector or tensor. The dimensions written in pink or blue at the start of the architecture are used to distinguish the size of data between the 1<sup>st</sup> learning (without laplacian) and the 2<sup>nd</sup> (with laplacians), respectively. The coloured arrows represent the different operations performed. The total number of parameters is indicated in pink for the 1<sup>st</sup> learning and in blue for the 2<sup>nd</sup> learning.

**Table S2.** Description of the U-Net architecture for the first training and the second. The pink and blue colours are used to distinguish differences in data shape between the 1<sup>st</sup> learning (without laplacian) and the 2<sup>nd</sup> (with laplacians), respectively. A residual block is composed by the succession of the following layers: Conv1D, BatchNormalization, ReLU, Conv1D, BatchNormalization, Add —to sum the input with the transformed output— and ReLU. A downsample layer corresponds to a MaxPooling1D. An upsample layer encompasses a Conv1DTranspose layer and a Concatenate layer which corresponds to the skip connection.

| Step                              | Layer            | Number of features | Number of filters (or channels) | Number of parameters<br>1 <sup>st</sup> learning | Number of parameters<br>2 <sup>nd</sup> learning |
|-----------------------------------|------------------|--------------------|---------------------------------|--------------------------------------------------|--------------------------------------------------|
| Input                             | Input            | $X'$ length        | -                               | 0                                                | 0                                                |
|                                   | Split            | 553 and 3          | -                               | 0                                                | -                                                |
|                                   |                  | 1,027 and 3        | -                               | -                                                | 0                                                |
|                                   | Lambda (reshape) | 79                 | 7                               | 0                                                | -                                                |
|                                   |                  | 79                 | 13                              | -                                                | 0                                                |
|                                   |                  | 1                  | 3                               | 0                                                | 0                                                |
|                                   | Lambda (repeat)  | 79                 | 3                               | 0                                                | 0                                                |
|                                   | Concatenate      | 79                 | 10                              | 0                                                | -                                                |
| 79                                |                  | 16                 | -                               | 0                                                |                                                  |
| Encoder                           | Residual block   | 79                 | 64                              | 15,808                                           | 17,344                                           |
|                                   | Downsample 1     | 40                 | 64                              | 0                                                | 0                                                |
|                                   | Residual block   | 40                 | 128                             | 83,840                                           | 83,840                                           |
|                                   | Downsample 2     | 20                 | 128                             | 0                                                | 0                                                |
|                                   | Residual block   | 20                 | 256                             | 233,216                                          | 233,216                                          |
|                                   | Downsample 3     | 10                 | 256                             | 0                                                | 0                                                |
|                                   | Residual block   | 10                 | 512                             | 1,318,400                                        | 1,318,400                                        |
|                                   | Downsample 4     | 5                  | 512                             | 0                                                | 0                                                |
| Bottleneck                        | Residual block   | 5                  | 1024                            | 5,258,240                                        | 5,258,240                                        |
| Decoder                           | Upsample 1       | 10                 | 512                             | 1,573,376                                        | 1,573,376                                        |
|                                   | Residual block   | 10                 | 512                             | 2,891,264                                        | 2,891,264                                        |
|                                   | Upsample 2       | 20                 | 256                             | 393,472                                          | 393,472                                          |
|                                   | Residual block   | 20                 | 256                             | 724,736                                          | 724,736                                          |
|                                   | Upsample 3       | 40                 | 128                             | 98,432                                           | 98,432                                           |
|                                   | Residual block   | 40                 | 128                             | 182,144                                          | 182,144                                          |
|                                   | Upsample 4       | 80                 | 64                              | 24,640                                           | 24,640                                           |
|                                   | Residual block   | 79                 | 64                              | 46,016                                           | 46,016                                           |
| Output                            | Conv1D           | 79                 | 6                               | 1,158                                            | 1,158                                            |
|                                   | Lambda (reshape) | $Y'$ length        | -                               | 0                                                | 0                                                |
| <b>Total number of parameters</b> |                  |                    |                                 | 12,844,742                                       | 12,846,278                                       |

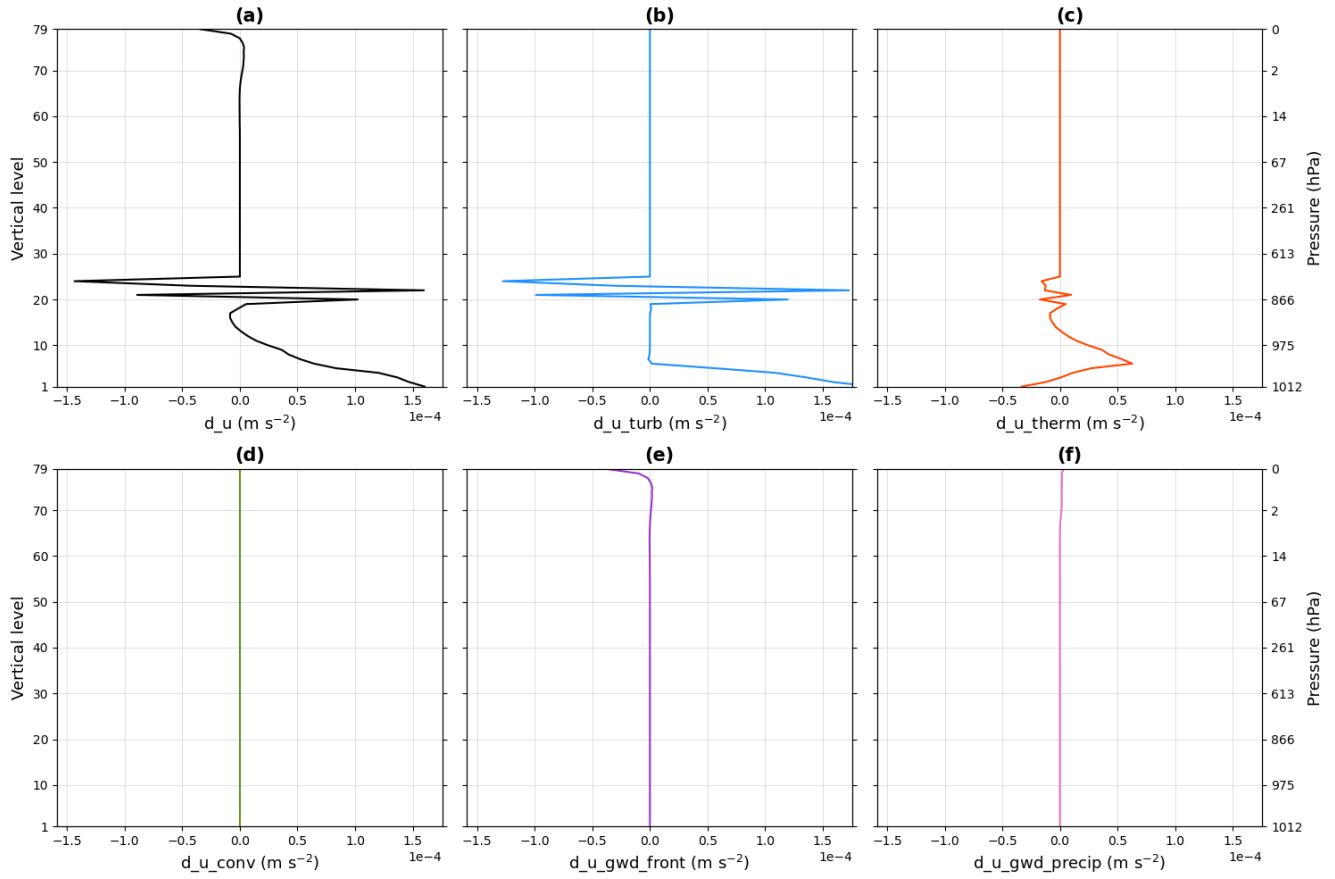

**Figure S3.** Vertical profile of the zonal wind tendency  $d_u$  (a) of the point A located in high latitudes for one time step, and vertical profiles of the physical processes involved in the decomposition of this tendency: turbulence (b), thermals (c), convection (d), gravity wave drag due to emission by fronts (e) and gravity wave drag due to emission by convective systems (f).

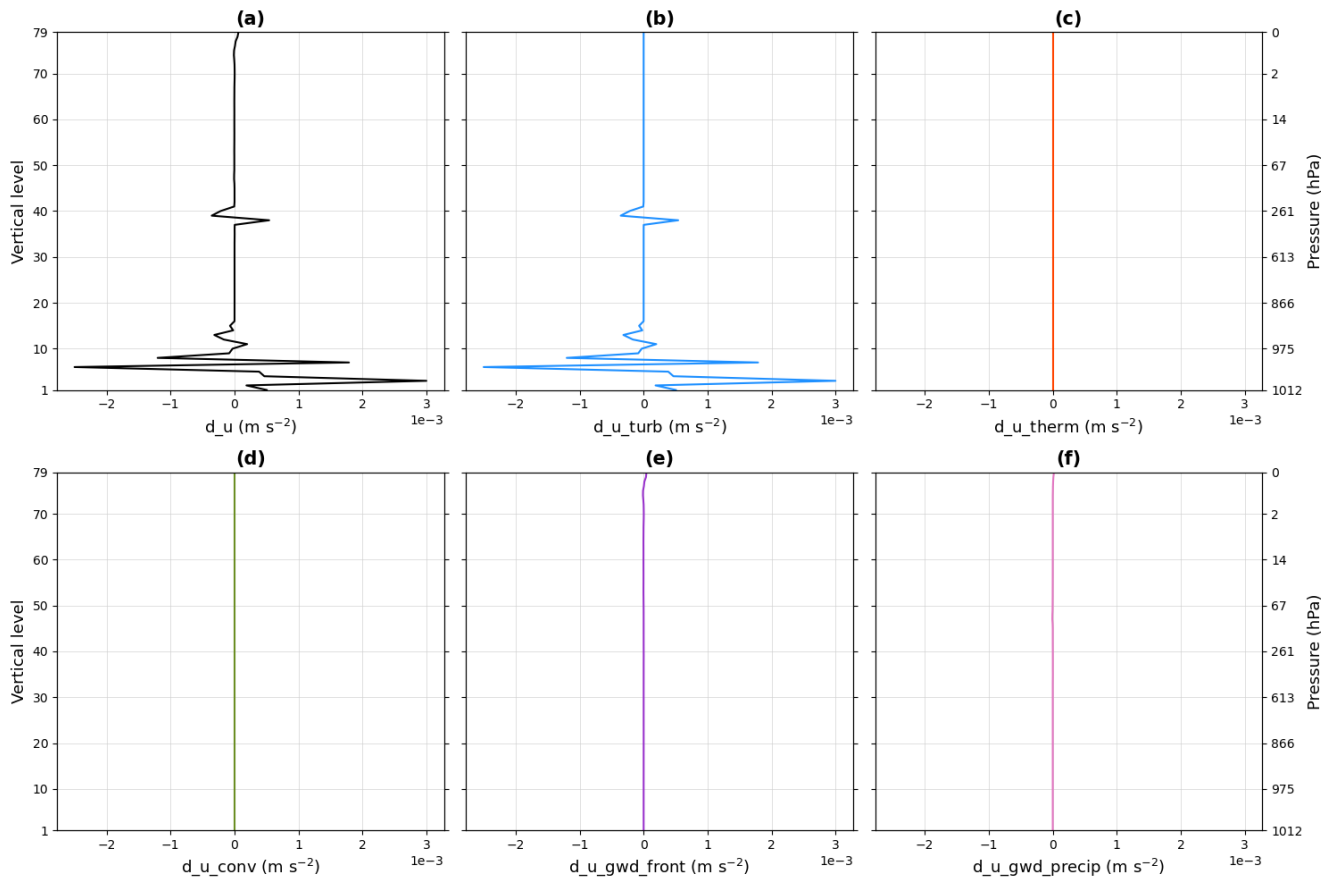

**Figure S4.** Same as Fig. S3 but for point B located in the subtropics.

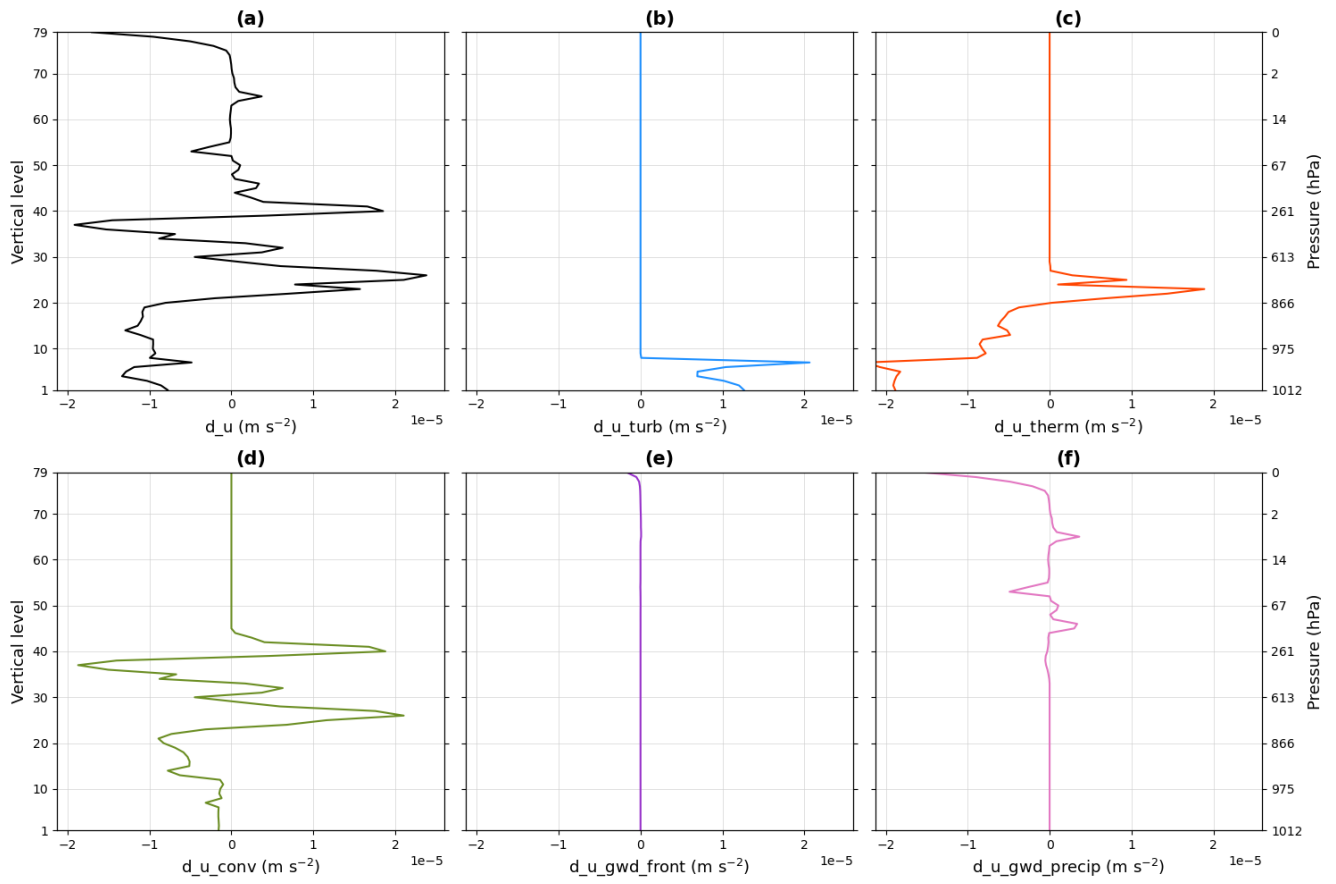

**Figure S5.** Same as Fig. S3 but for point C located near the equator.

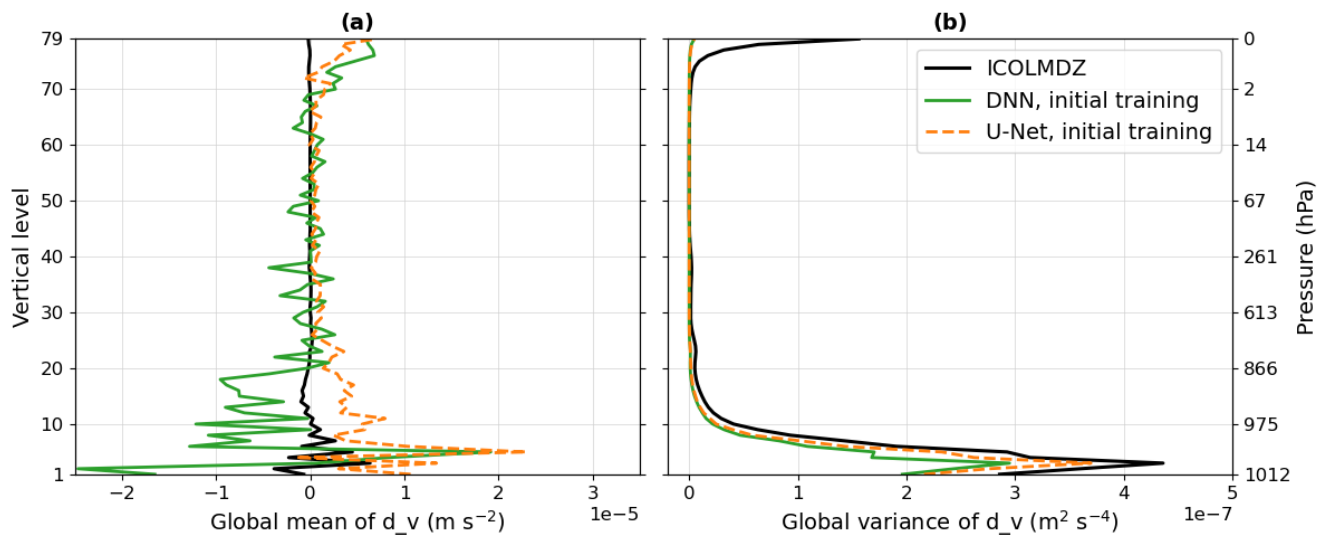

Figure S6. Same as Fig. 3 but for the meridional wind tendency  $d_v$ .

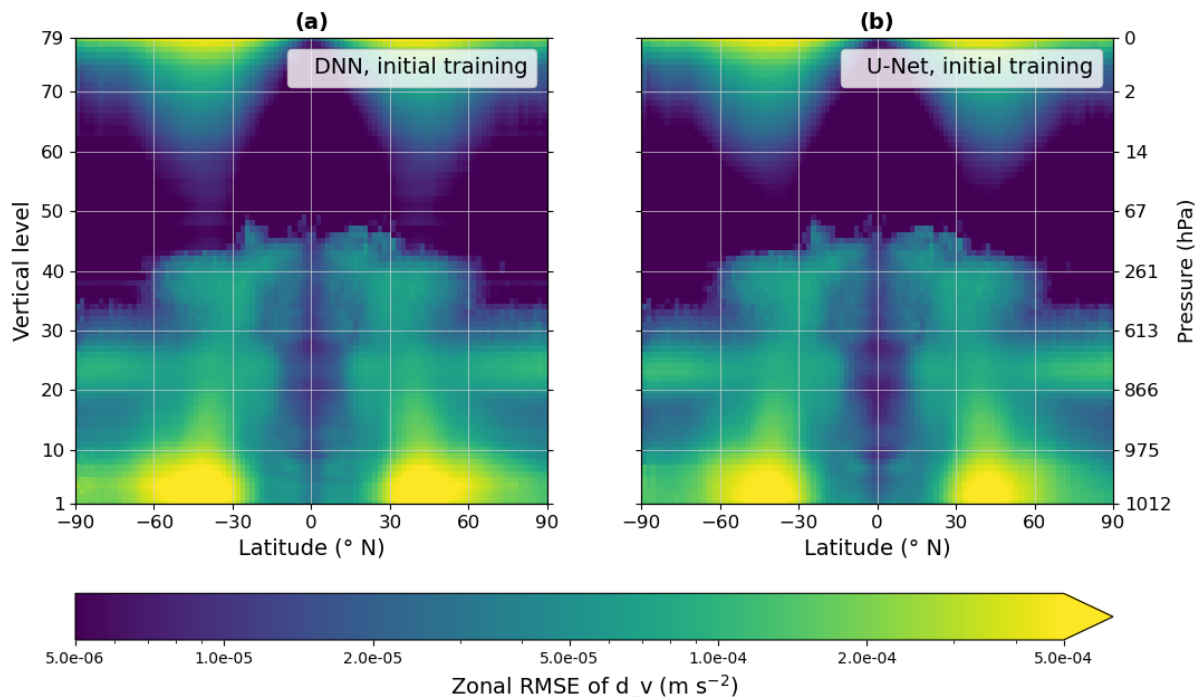

Figure S7. Same as Fig. 4 but for the meridional wind tendency  $d_v$ .

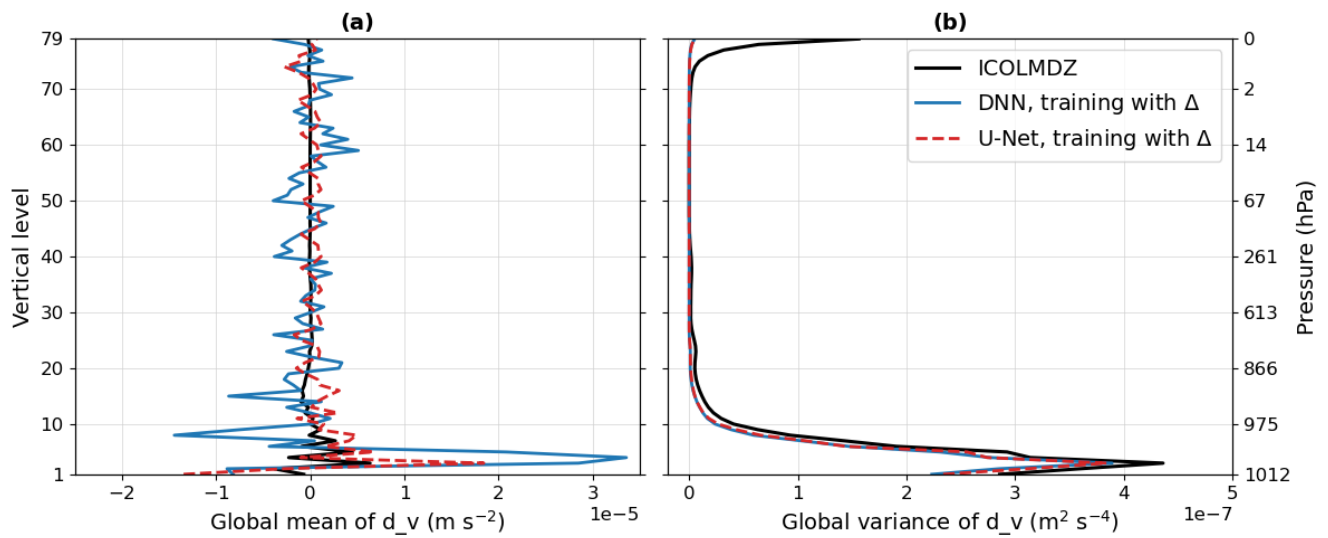

**Figure S8.** Same as Fig. 9 but for the meridional wind tendency  $d_v$ .

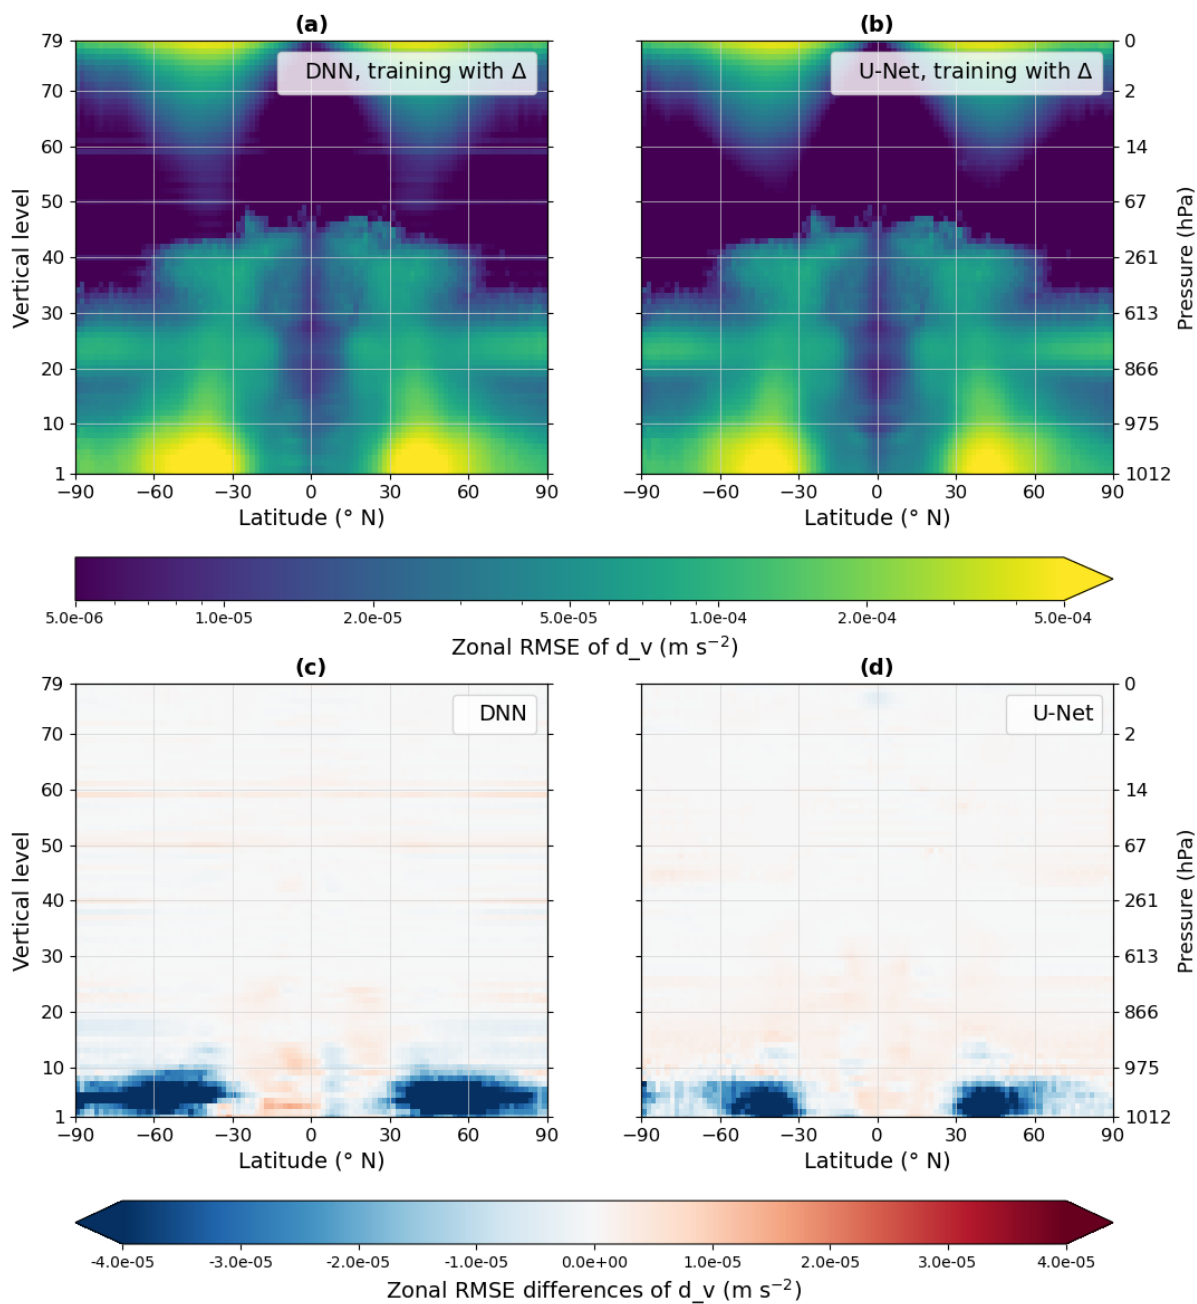

**Figure S9.** Same as Fig. 10 but for the meridional wind tendency  $d_v$ .

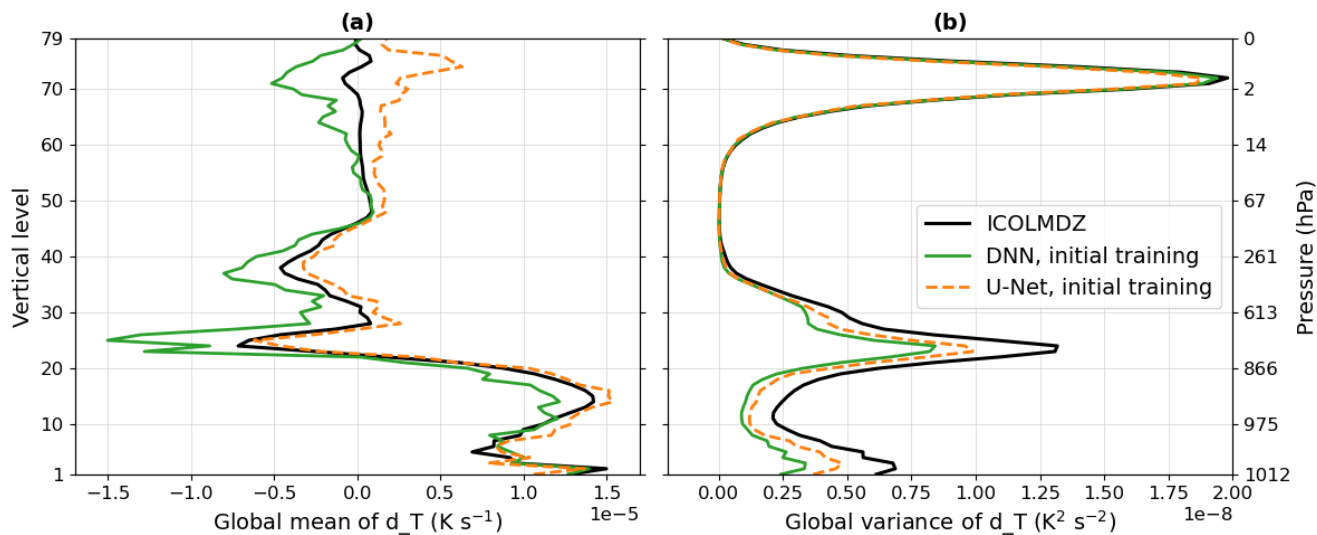

Figure S10. Same as Fig. 3 but for the temperature tendency  $d_T$ .

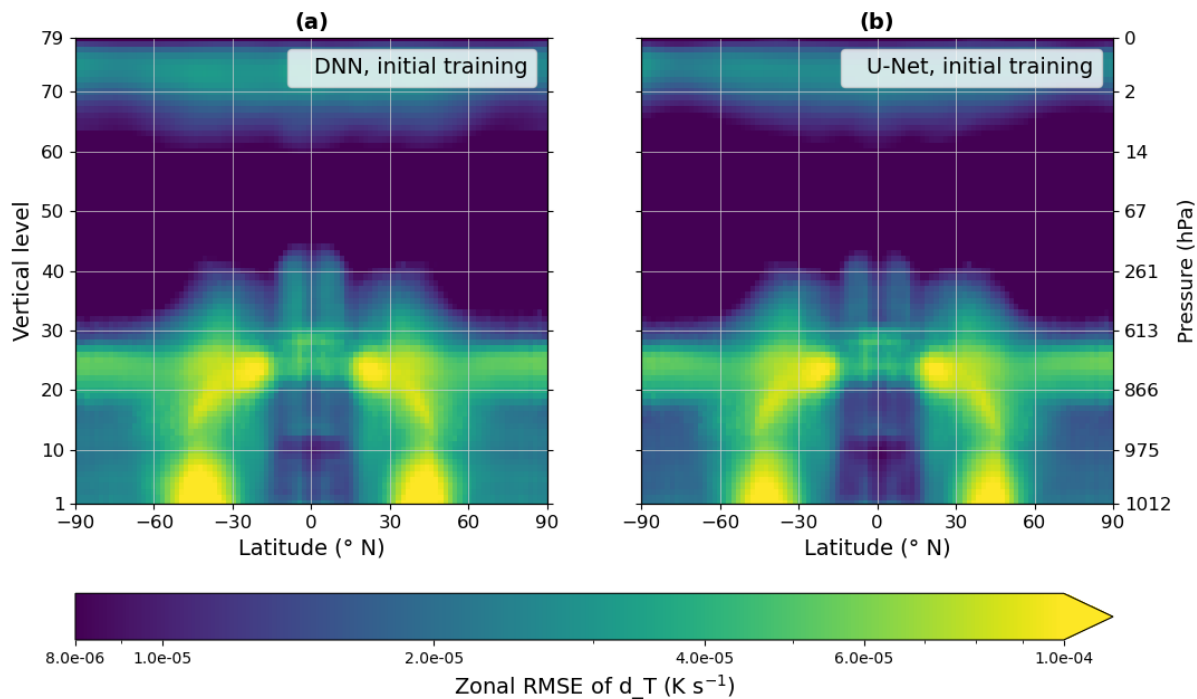

Figure S11. Same as Fig. 4 but for the temperature tendency  $d_T$ .

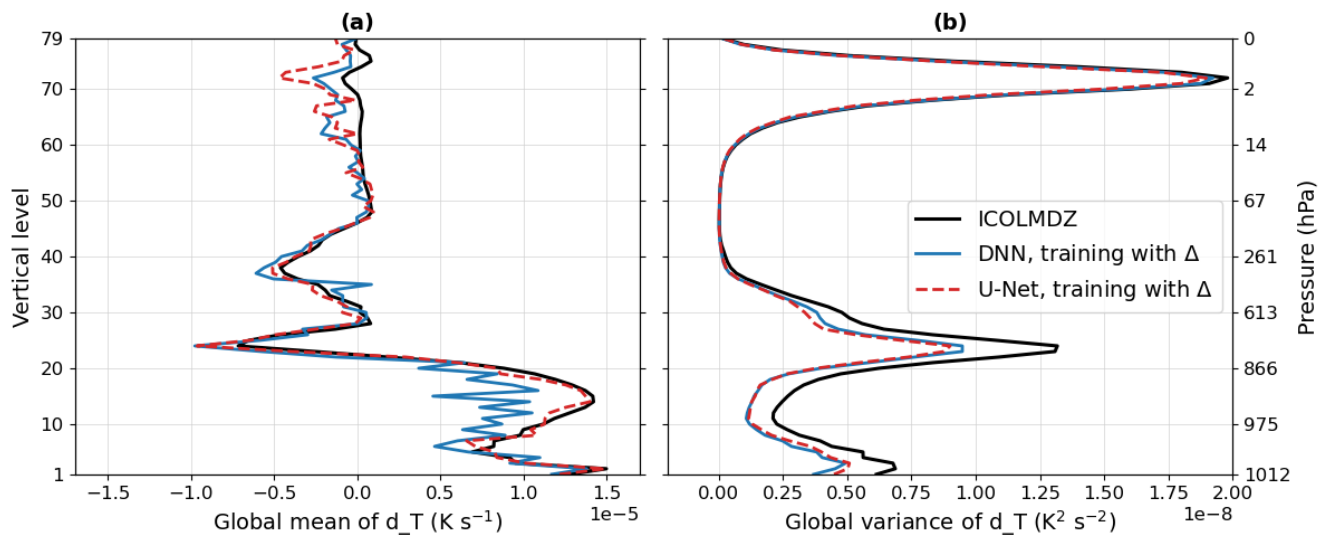

**Figure S12.** Same as Fig. 9 but for the temperature tendency  $d_T$ .

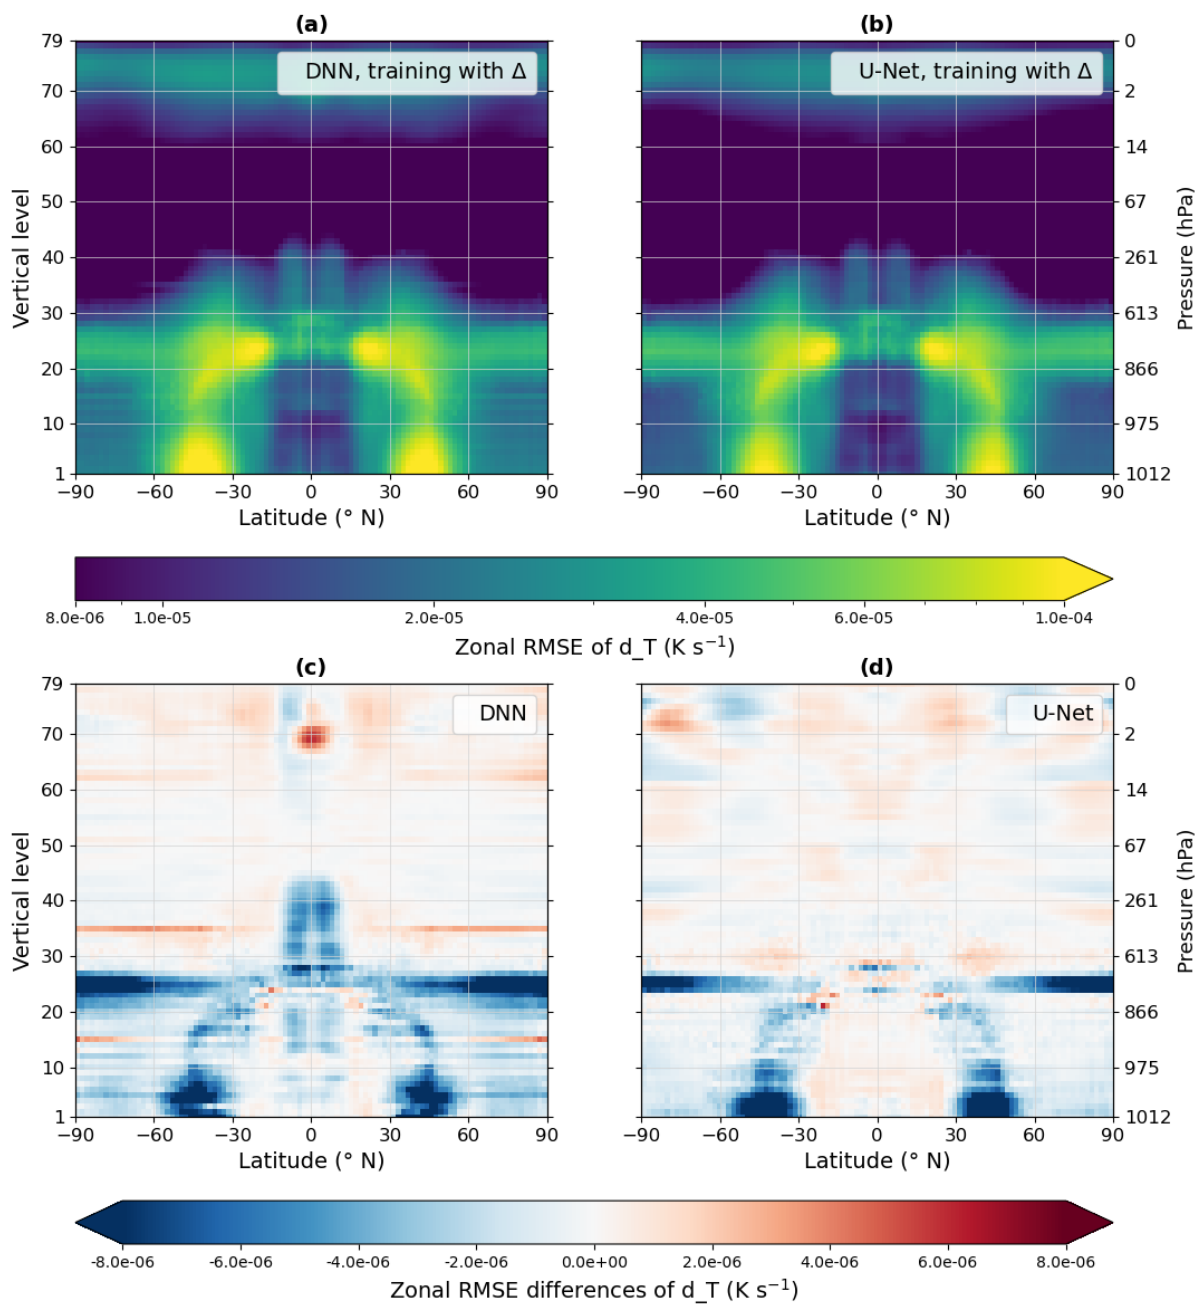

**Figure S13.** Same as Fig. 10 but for the temperature tendency  $d_T$ .

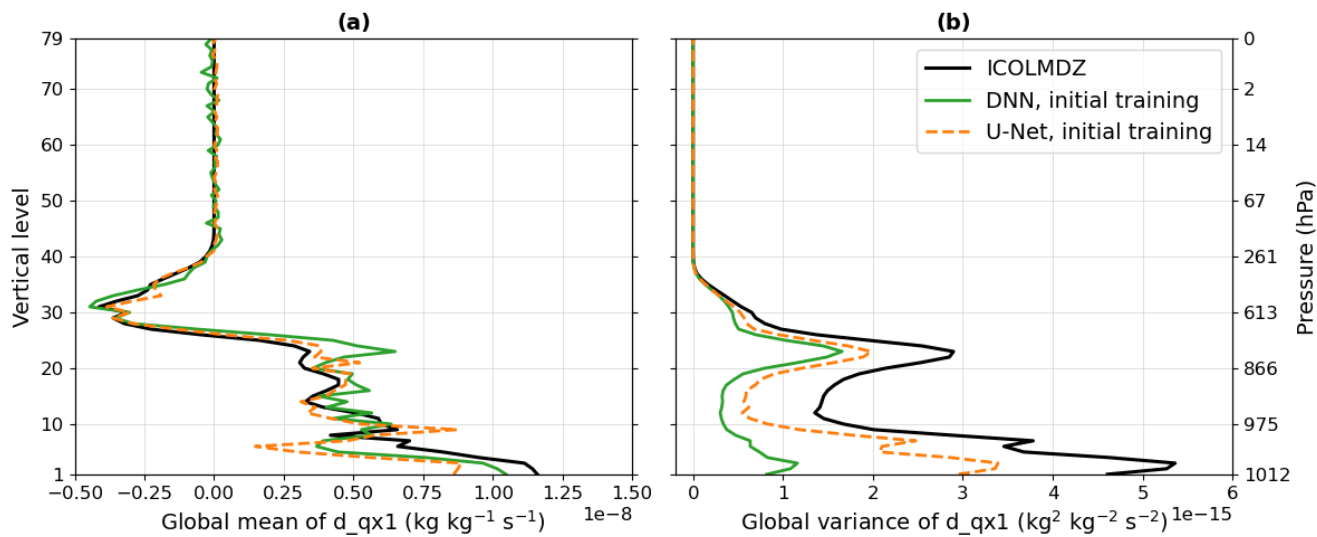

Figure S14. Same as Fig. 3 but for the humidity tendency  $d_{qx1}$ .

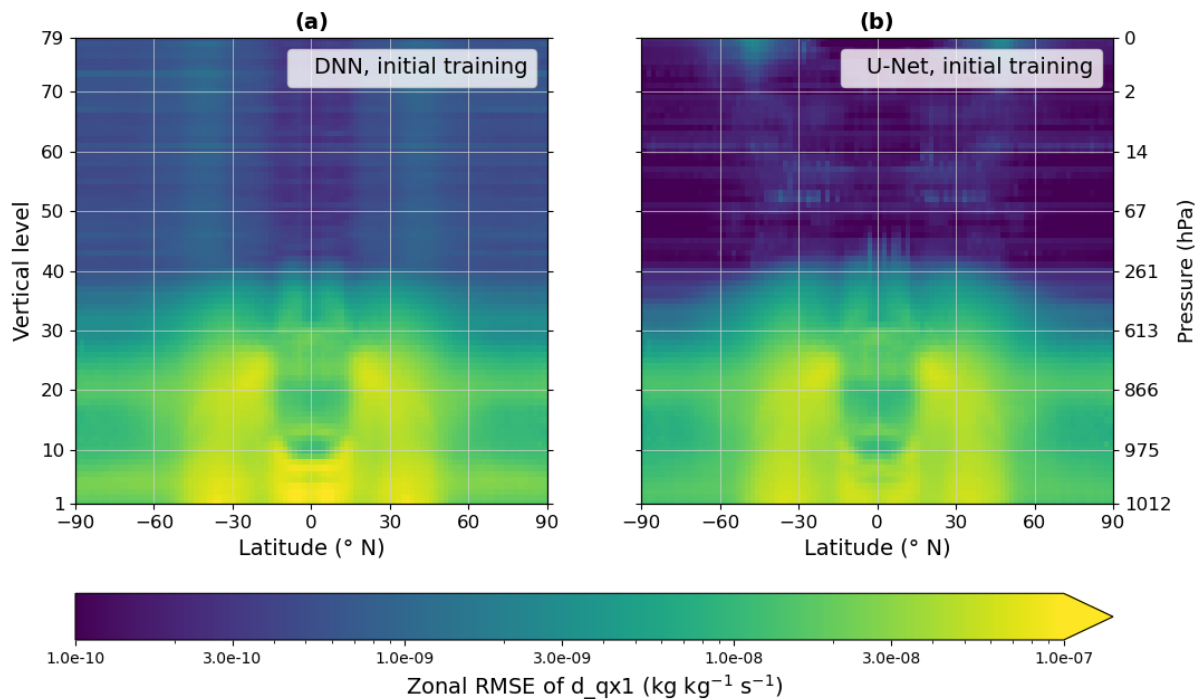

Figure S15. Same as Fig. 4 but for the humidity tendency  $d_{qx1}$ .

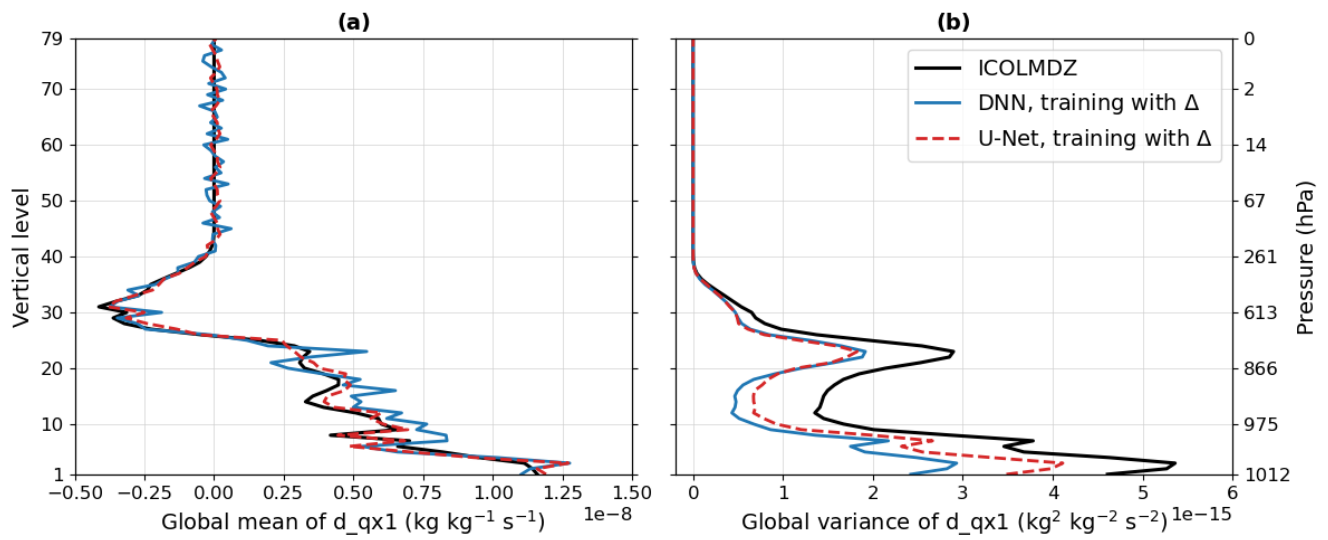

**Figure S16.** Same as Fig. 9 but for the humidity tendency  $d_{qx1}$ .

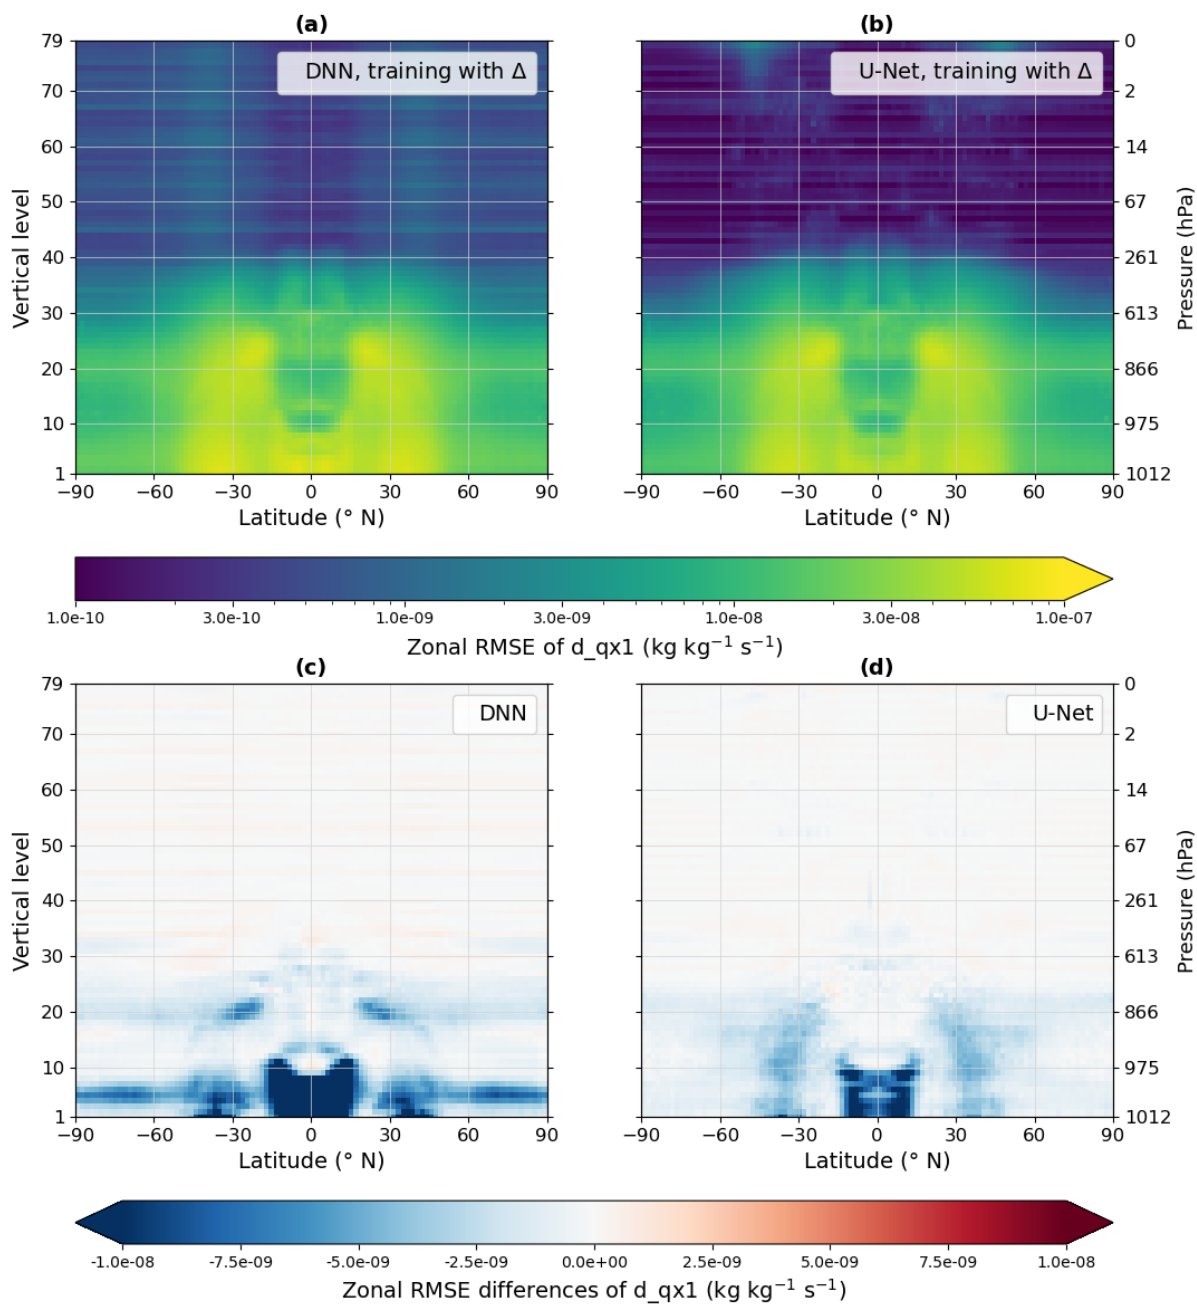

Figure S17. Same as Fig. 10 but for the humidity tendency  $d_{qx1}$ .

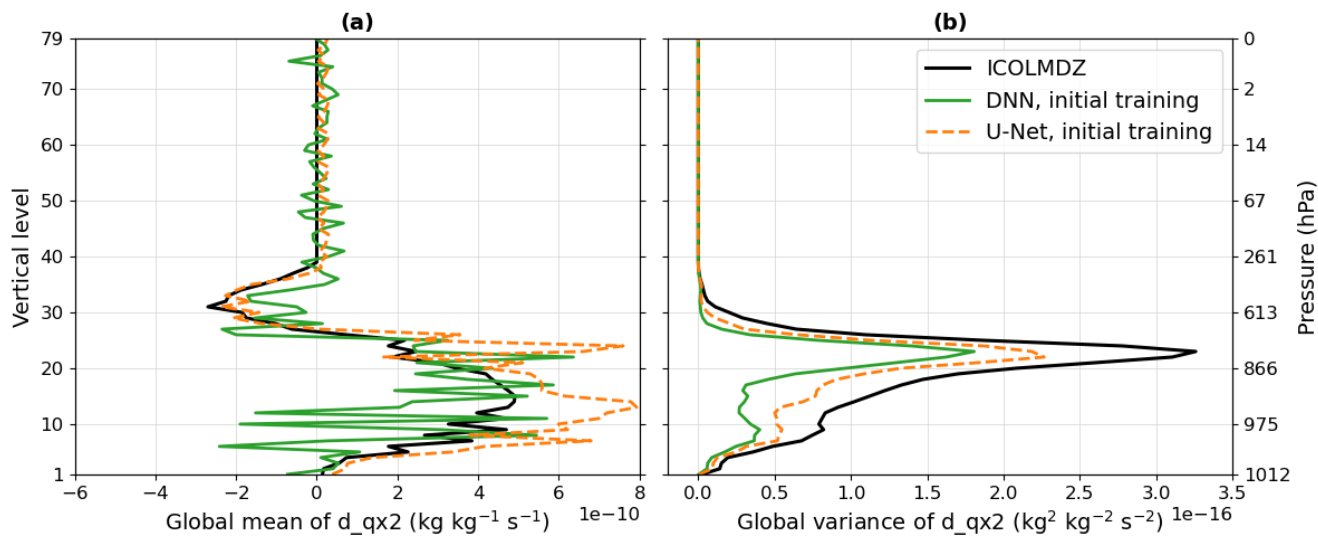

Figure S18. Same as Fig. 3 but for the liquid water tendency  $d_{qx2}$ .

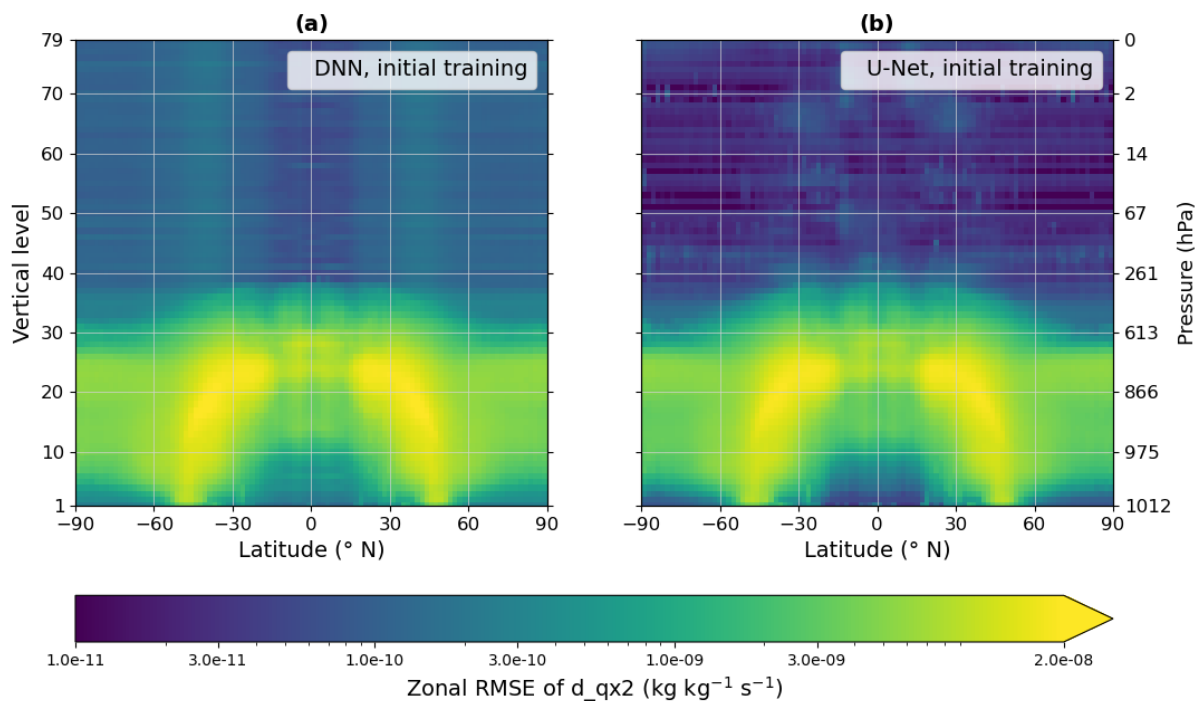

Figure S19. Same as Fig. 4 but for the liquid water tendency  $d_{qx2}$ .

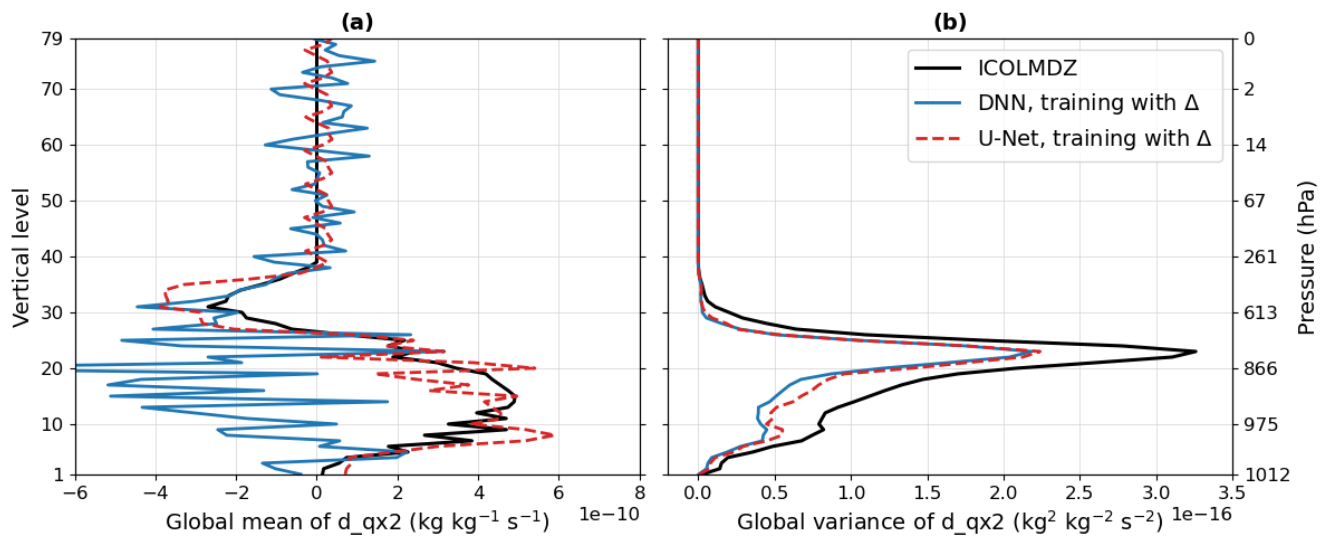

**Figure S20.** Same as Fig. 9 but for the liquid water tendency  $d_{qx2}$ .

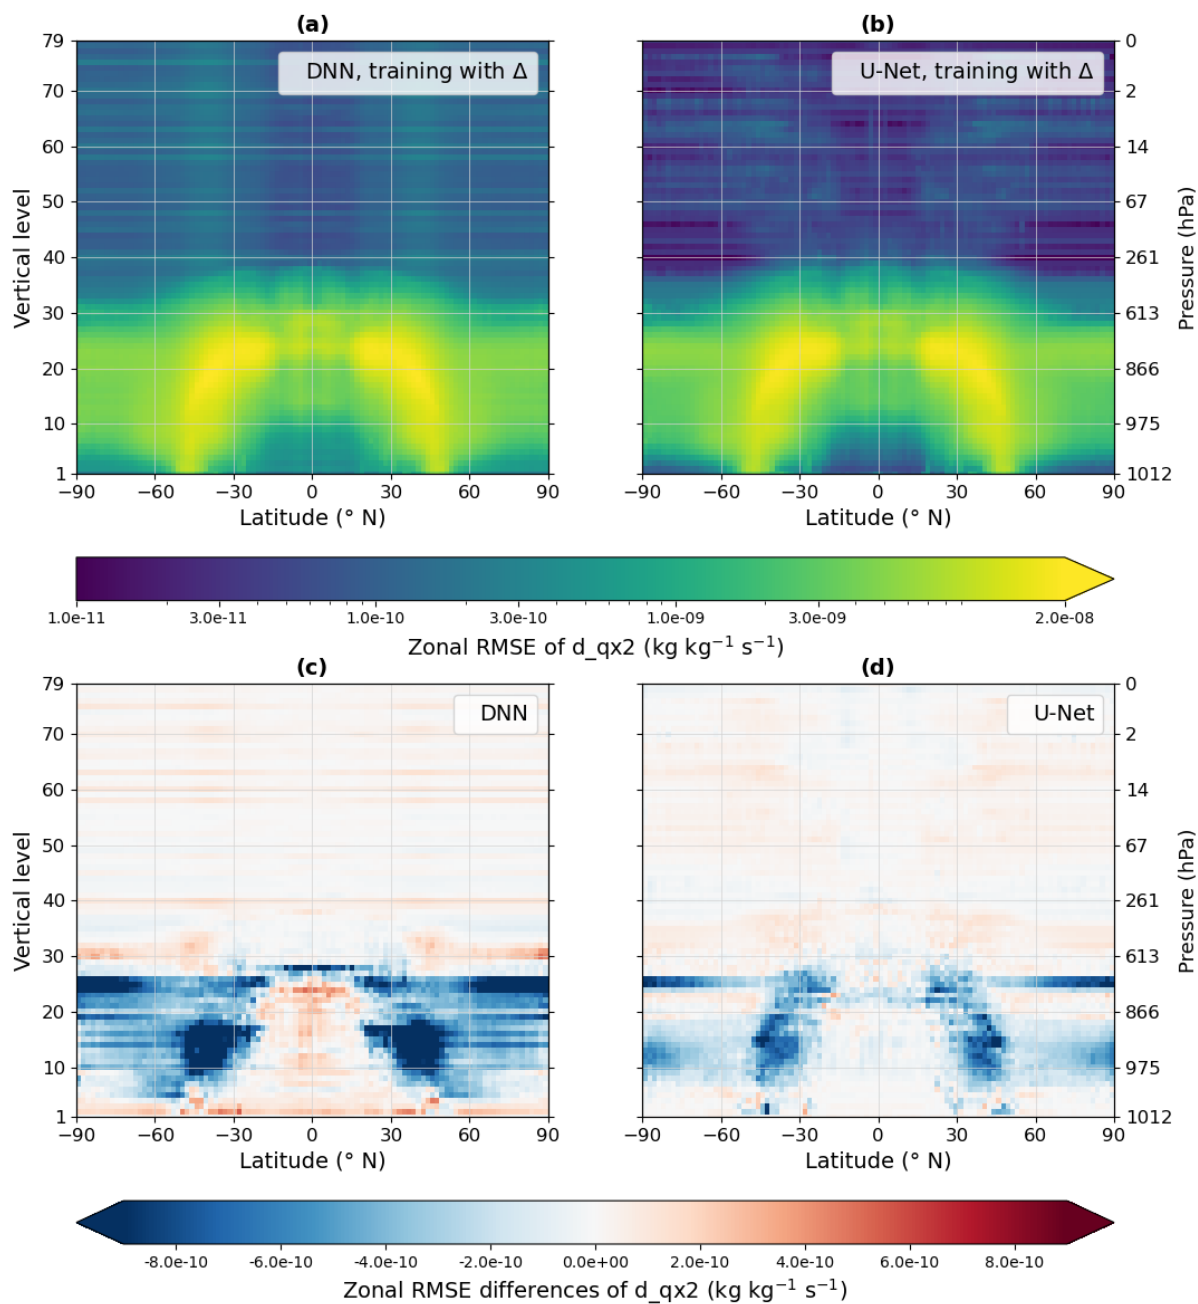

Figure S21. Same as Fig. 10 but for the liquid water tendency  $d_{qx2}$ .

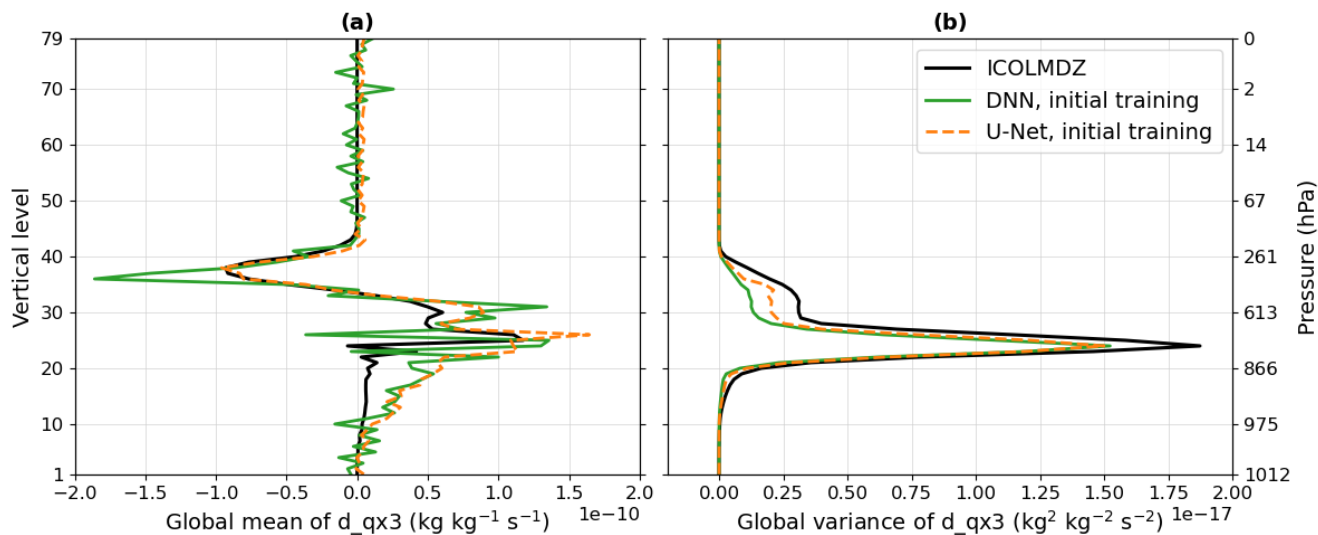

Figure S22. Same as Fig. 3 but for the solid water tendency  $d_{qx3}$ .

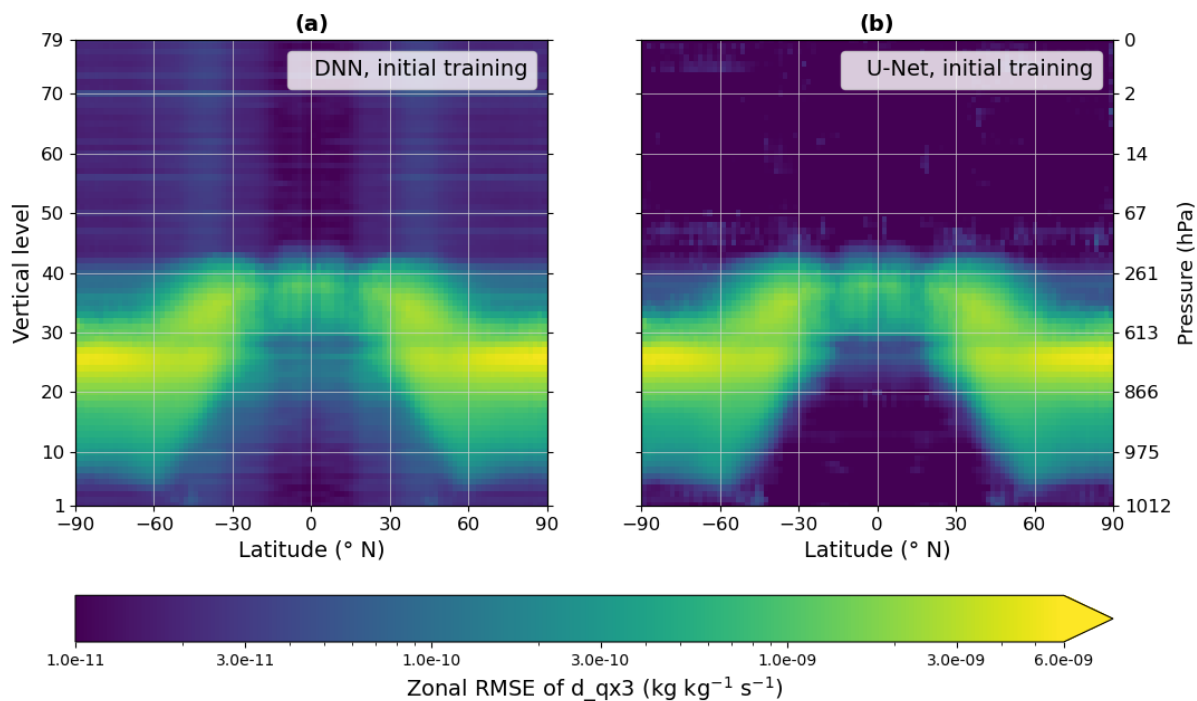

Figure S23. Same as Fig. 4 but for the solid water tendency  $d_{qx3}$ .

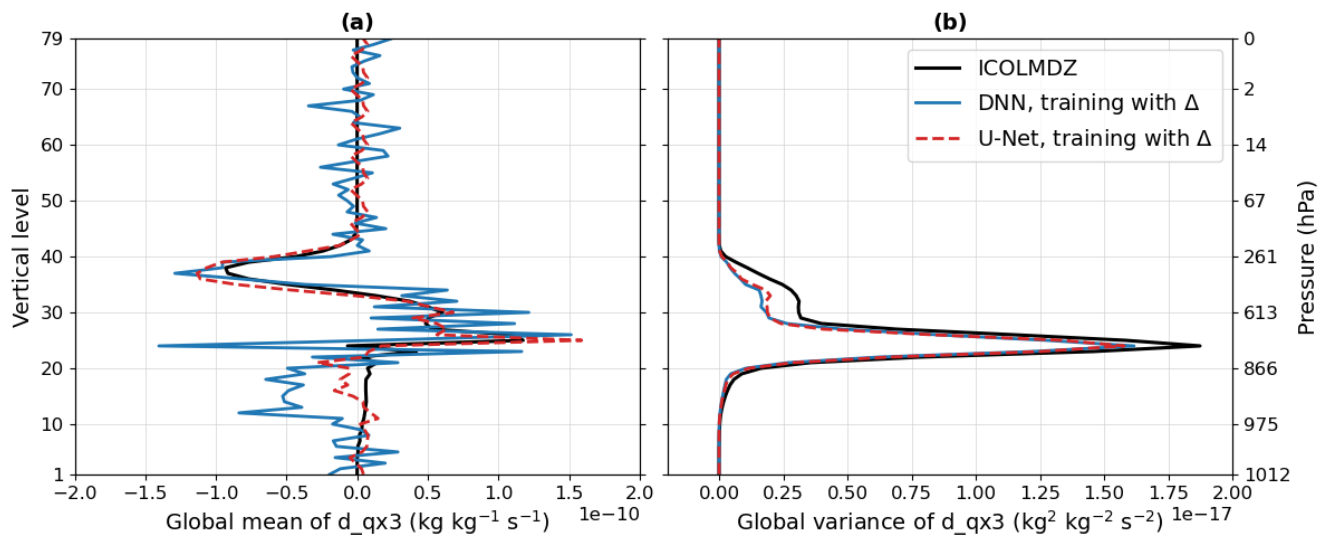

**Figure S24.** Same as Fig. 9 but for the solid water tendency  $d_{qx3}$ .

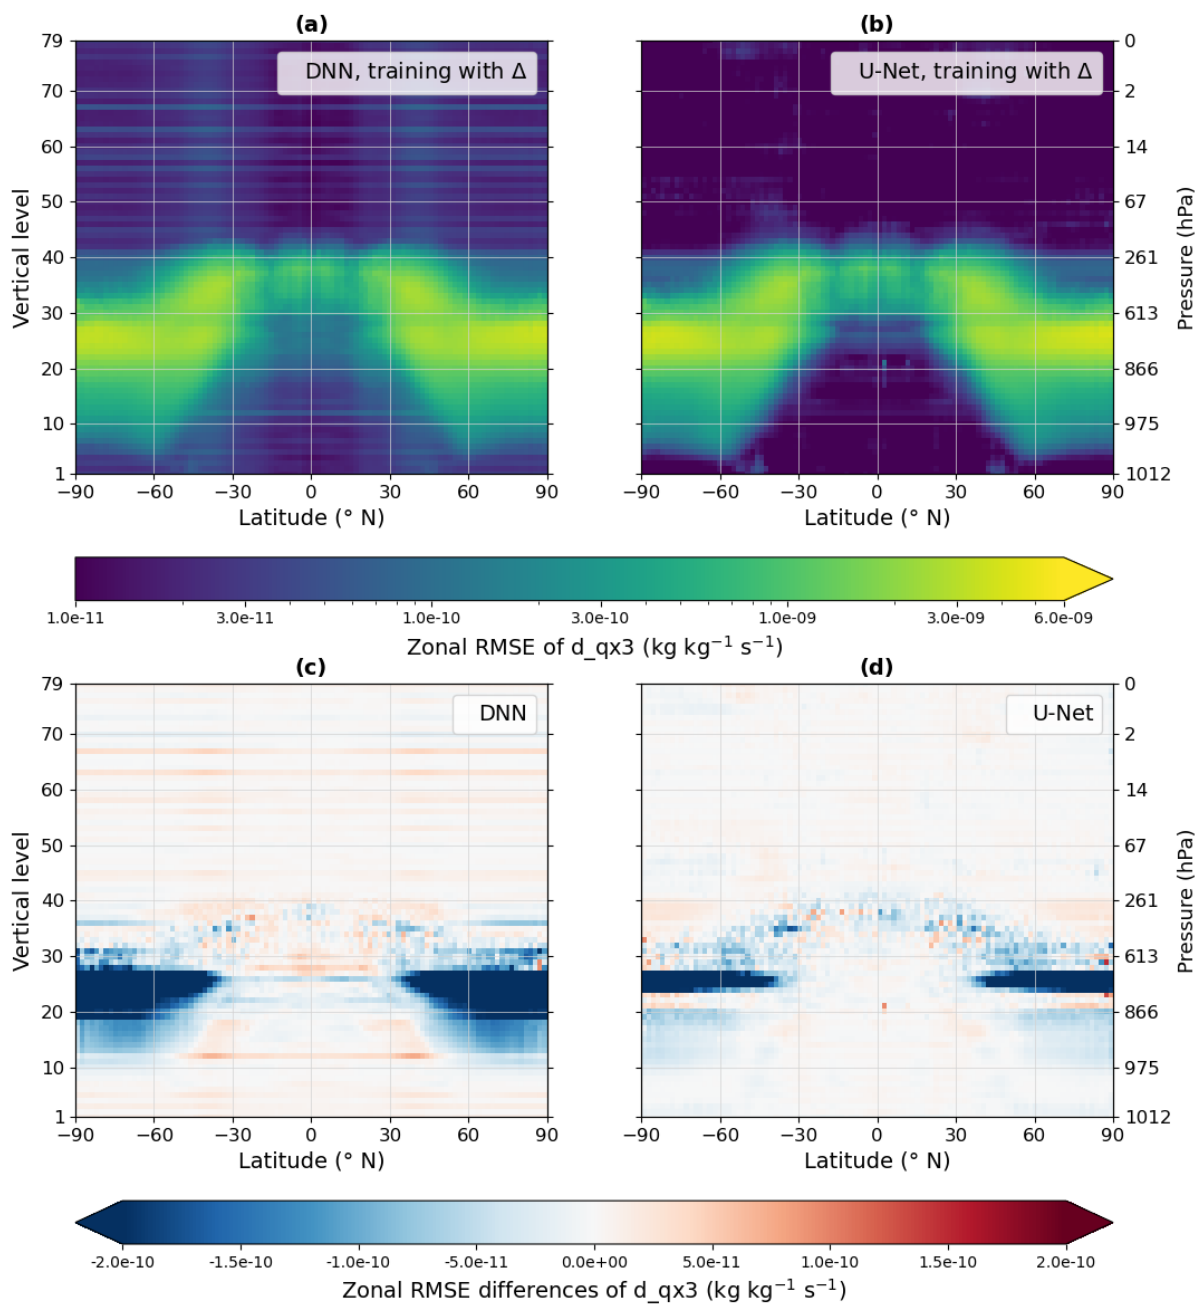

Figure S25. Same as Fig. 10 but for the solid water tendency  $d_{qx3}$ .
